# Supplementary material
Source: Springer Nature journal article supplement (https://mijn.bsl.nl/resource/supplementary/13047_2008_10_MOESM7_ESM.pdf/7108700)

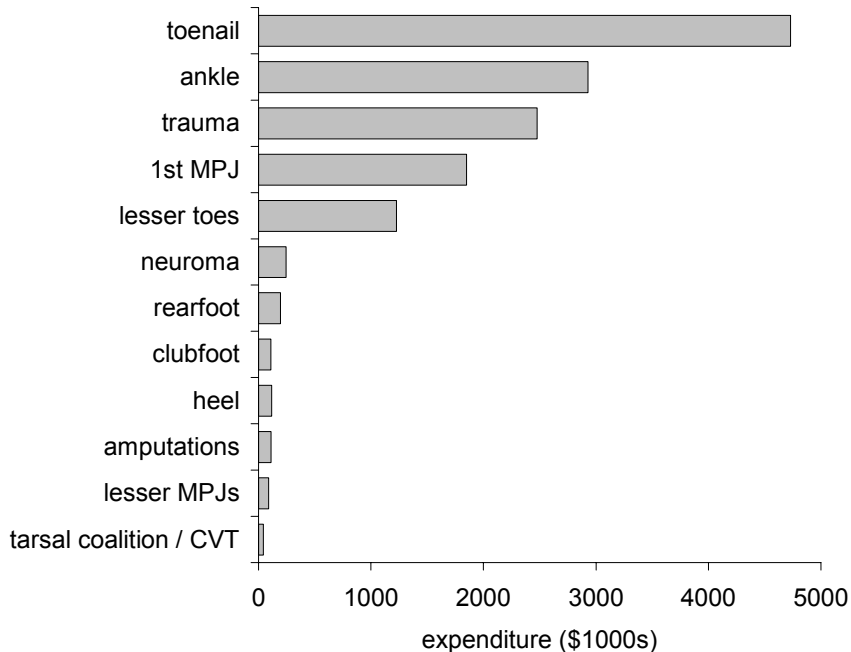

Supplement: MOESM7 [file 7108700]
